# Supplementary material for: Technology-Based Interventions to Reduce Sugar-Sweetened Beverages among Adolescents: A Scoping Review
Source: MDPI journal article supplement (doi:10.3390/ijerph20237101), 2023-11-23
Supplement: s1 [file s1]

# Supplementary File S1: Medline Ovid Search Strategy

|    |                                                                                                                                                                                                                                                                                                                                                                                                            |        |
|----|------------------------------------------------------------------------------------------------------------------------------------------------------------------------------------------------------------------------------------------------------------------------------------------------------------------------------------------------------------------------------------------------------------|--------|
| 1  | exp Sugar-Sweetened Beverages/                                                                                                                                                                                                                                                                                                                                                                             | 974    |
| 2  | "sugar-sweetened beverages".mp. [mp=title, book title, abstract, original title, name of substance word, subject heading word, floating sub-heading word, keyword heading word, organism supplementary concept word, protocol supplementary concept word, rare disease supplementary concept word, unique identifier, synonyms, population supplementary concept word, anatomy supplementary concept word] | 3330   |
| 3  | "sweetened beverages".mp. [mp=title, book title, abstract, original title, name of substance word, subject heading word, floating sub-heading word, keyword heading word, organism supplementary concept word, protocol supplementary concept word, rare disease supplementary concept word, unique identifier, synonyms, population supplementary concept word, anatomy supplementary concept word]       | 4008   |
| 4  | "sugar drinks".mp. [mp=title, book title, abstract, original title, name of substance word, subject heading word, floating sub-heading word, keyword heading word, organism supplementary concept word, protocol supplementary concept word, rare disease supplementary concept word, unique identifier, synonyms, population supplementary concept word, anatomy supplementary concept word]              | 54     |
| 5  | "soft drinks".mp. [mp=title, book title, abstract, original title, name of substance word, subject heading word, floating sub-heading word, keyword heading word, organism supplementary concept word, protocol supplementary concept word, rare disease supplementary concept word, unique identifier, synonyms, population supplementary concept word, anatomy supplementary concept word]               | 3134   |
| 6  | "energy drinks".mp. [mp=title, book title, abstract, original title, name of substance word, subject heading word, floating sub-heading word, keyword heading word, organism supplementary concept word, protocol supplementary concept word, rare disease supplementary concept word, unique identifier, synonyms, population supplementary concept word, anatomy supplementary concept word]             | 1532   |
| 7  | soda.mp. [mp=title, book title, abstract, original title, name of substance word, subject heading word, floating sub-heading word, keyword heading word, organism supplementary concept word, protocol supplementary concept word, rare disease supplementary concept word, unique identifier, synonyms, population supplementary concept word, anatomy supplementary concept word]                        | 4173   |
| 8  | 1 or 2 or 3 or 4 or 5 or 6 or 7                                                                                                                                                                                                                                                                                                                                                                            | 12010  |
| 9  | exp Health Promotion/                                                                                                                                                                                                                                                                                                                                                                                      | 85777  |
| 10 | "health promotion".mp. [mp=title, book title, abstract, original title, name of substance word, subject heading word, floating sub-heading word, keyword heading word, organism supplementary concept word, protocol supplementary concept word, rare disease supplementary concept word, unique identifier, synonyms, population supplementary concept word, anatomy supplementary concept word]          | 100178 |
| 11 | "health intervention".mp. [mp=title, book title, abstract, original title, name of substance word, subject heading word, floating sub-heading word, keyword heading word, organism supplementary concept word, protocol supplementary concept word, rare disease supplementary concept word, unique identifier, synonyms, population supplementary concept word, anatomy supplementary concept word]       | 5180   |
| 12 | intervention.mp. [mp=title, book title, abstract, original title, name of substance word, subject heading word, floating sub-heading word, keyword heading word, organism supplementary concept word, protocol supplementary concept word, rare disease supplementary concept word, unique identifier, synonyms, population supplementary concept word, anatomy supplementary concept word]                | 704064 |
| 13 | 9 and 10 and 12                                                                                                                                                                                                                                                                                                                                                                                            | 17339  |
| 14 | 8 and 13                                                                                                                                                                                                                                                                                                                                                                                                   | 200    |
| 15 | limit 14 to (english language and yr="2013 -Current")                                                                                                                                                                                                                                                                                                                                                      | 146    |
